# Supplementary material
Source: Springer Nature journal article supplement (https://www.springermedizin.de/resource/supplementary/12879_2003_65_MOESM1_ESM.pdf/9448082)

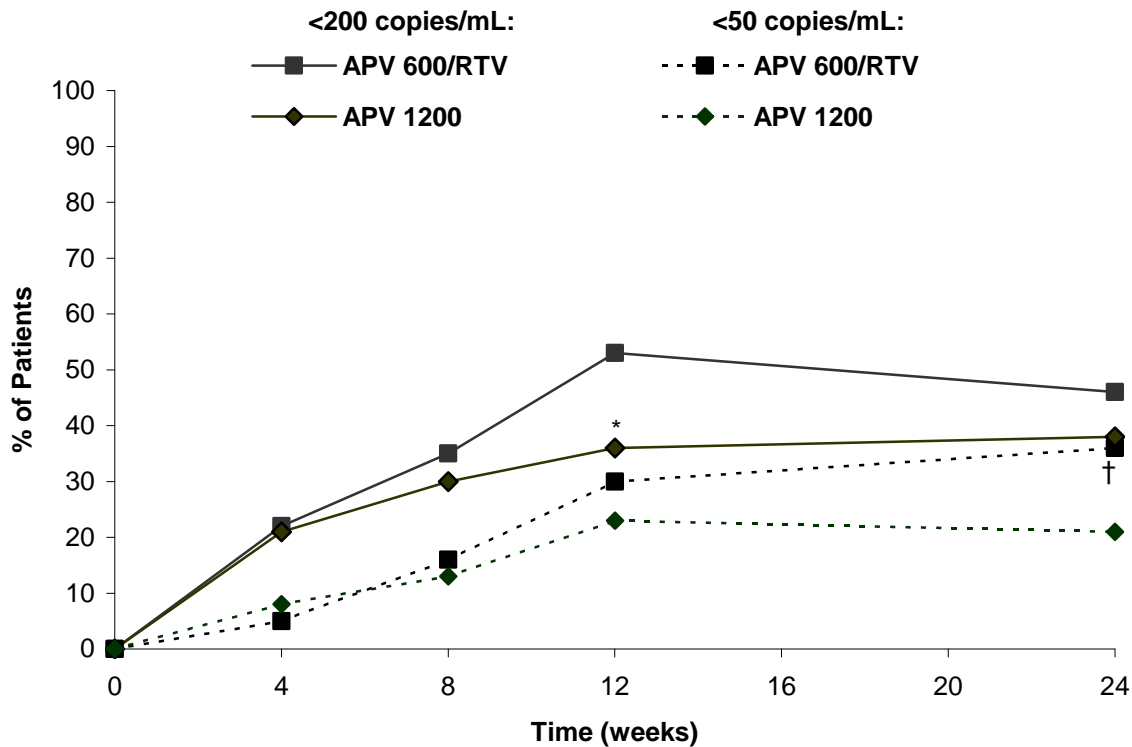

APV 600/RTV

n= 158      158      158      158      158

APV 1200

n= 53      53      53      53      53

\*p=0.029

†p=0.039

Supplement: MOESM1 [file 9448082]
